# Supplementary material for: Photoelectron spectroscopy and theoretical studies of anion–π interactions: binding strength and anion specificity
Source: Royal Society of Chemistry journal article supplement (doi:10.1039/c4cp04687k), 2014-12-16
Supplement: c4cp04687k1.pdf [file c4cp04687k1.pdf]

## Supporting information

### Photoelectron Spectroscopy and Theoretical Studies of Anion- $\pi$ Interactions: Binding Strength and Anion Specificity

Jian Zhang,<sup>†,‡</sup> Bin Zhou,<sup>†</sup> Zhen-Rong Sun,<sup>\*,†</sup> and Xue-Bin Wang<sup>\*,‡</sup>

<sup>†</sup>State Key Laboratory of Precision Spectroscopy, East China Normal University, Shanghai  
200062, China

<sup>‡</sup>Physical Sciences Division, Pacific Northwest National Laboratory, 902 Battelle Boulevard,  
P. O. Box 999, MS K8-88, Richland, Washington 99352, United States

#### Corresponding Authors

[xuebin.wang@pnnl.gov](mailto:xuebin.wang@pnnl.gov); [zrsun@phy.ecnu.edu.cn](mailto:zrsun@phy.ecnu.edu.cn);

#### Table of Contents

|                                                                                                                                                                                                                                                                  |     |
|------------------------------------------------------------------------------------------------------------------------------------------------------------------------------------------------------------------------------------------------------------------|-----|
| Figure S1— Schematic depiction of relationship between the increase of electron binding energy of an anion upon interacting with a neutral molecule and the binding energy between the anion and the neutral molecule .....                                      | S2  |
| Figure S2—Top and side view of $\omega$ B97XD/6-311++g(d,p) (for C, H, O, Cl, N, S atoms) and $\omega$ B97XD/aug-cc-pvtz-pp (for I atom) geometries for $\mathbf{1}\cdot\text{Br}^-$ and $\mathbf{1}\cdot\text{I}^-$ .....                                       | S3  |
| Table S1— Coordinates of $\mathbf{1}\cdot\text{Cl}^-$ , $\mathbf{1}\cdot\text{Br}^-$ , $\mathbf{1}\cdot\text{I}^-$ , $\mathbf{1}\cdot\text{SCN}^-$ , $\mathbf{1}\cdot\text{NO}_3^-$ , $\mathbf{1}\cdot\text{IO}_3^-$ and $\mathbf{1}\cdot\text{SO}_4^{2-}$ ..... | S4  |
| Table S2— The single-point $\omega$ B97XD and M06-2X energies of the $\mathbf{1}\cdot$ anion complexes<br>...S12                                                                                                                                                 |     |
| Table S3— The electron density of the H-bond between the C-H and the anion .....                                                                                                                                                                                 | S13 |

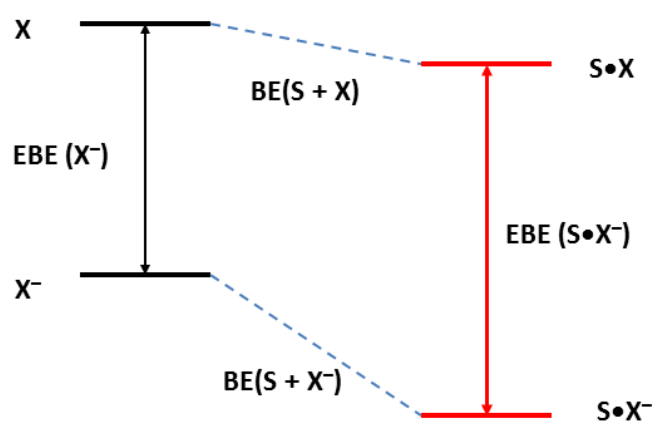

$$\Delta EBE = EBE(S\bullet X^-) - EBE(X^-) = BE(S + X^-) - BE(S + X)$$

X<sup>-</sup>: Anion; S: Solvent molecule; EBE: Electron binding energy;  
 BE: Binding Energy between S and X<sup>-</sup>.

**Figure S1.** Schematic depiction of relationship between the increase of electron binding energy of an anion X<sup>-</sup> upon interacting with a neutral molecule S, and the binding energy between the anion X<sup>-</sup> and the neutral molecule S. In this work, S refers to the  $\pi$  molecule **1**.

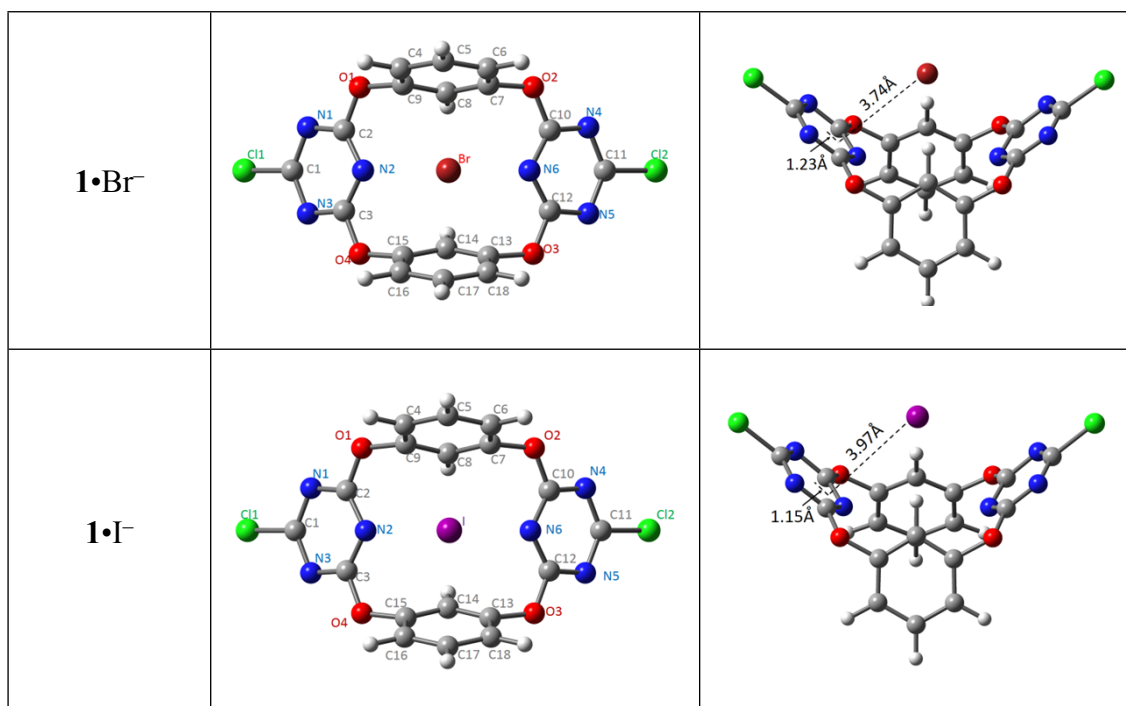

**Figure S2.** Top and side view of  $\omega$ B97XD/6-311++g(d,p) (for the C, H, O, Cl, N, S atoms) and aug-cc-pvtz-pp (for the I atom) geometries for  $1 \cdot \text{Br}^-$  and  $1 \cdot \text{I}^-$ .

**Table S1. Coordinates of 1•Cl<sup>-</sup>, 1•Br<sup>-</sup>, 1•I<sup>-</sup>, 1•SCN<sup>-</sup>, 1•NO<sub>3</sub><sup>-</sup>, 1•IO<sub>3</sub><sup>-</sup> and 1•SO<sub>4</sub><sup>2-</sup>**1•Cl<sup>-</sup>

| Atomic<br>Type | Coordinates (Angstroms) |             |             |
|----------------|-------------------------|-------------|-------------|
|                | X                       | Y           | Z           |
| C              | -2.81880000             | 1.10677600  | -0.07268100 |
| N              | -3.82792400             | 1.18282300  | -0.93763900 |
| C              | -4.26423300             | -0.00021500 | -1.30813200 |
| C              | -2.81936500             | -1.10579600 | -0.07075600 |
| N              | -2.29008400             | 0.00080100  | 0.42140600  |
| N              | -3.82845100             | -1.18280800 | -0.93559500 |
| O              | -2.38110900             | 2.28871000  | 0.35237000  |
| C              | -1.16898000             | 2.38240600  | 1.02656000  |
| C              | -1.19176300             | 2.85771200  | 2.32768200  |
| C              | 0.00836700              | 2.12663200  | 0.34682900  |
| C              | 0.01532500              | 3.08879200  | 2.97548100  |
| H              | -2.14245100             | 3.04727200  | 2.81051000  |
| C              | 1.18864600              | 2.38207600  | 1.02062200  |
| H              | 0.00341000              | 1.70821400  | -0.66362400 |
| C              | 1.21900700              | 2.85739100  | 2.32157900  |
| H              | 0.01804600              | 3.46161800  | 3.99344100  |
| H              | 2.17225000              | 3.04689300  | 2.79935600  |
| O              | 2.39866300              | 2.28812400  | 0.34046900  |
| C              | 2.83877700              | 1.10653200  | -0.07990200 |
| N              | 2.30200000              | 0.00011200  | 0.40516600  |
| C              | 2.83820500              | -1.10719100 | -0.07840600 |
| C              | 4.29733900              | -0.00152600 | -1.30042500 |
| N              | 3.85685800              | -1.18404500 | -0.93296400 |
| N              | 3.85740400              | 1.18169300  | -0.93455300 |
| O              | 2.39751500              | -2.28801300 | 0.34345900  |
| O              | -2.38227400             | -2.28721000 | 0.35641600  |
| C              | -1.16993600             | -2.38031200 | 1.03046300  |
| C              | 0.00729700              | -2.12567000 | 0.35015100  |
| C              | -1.19262700             | -2.85405500 | 2.33214400  |
| C              | 1.18769000              | -2.38068000 | 1.02395600  |
| H              | 0.00225600              | -1.70851100 | -0.66082100 |
| C              | 0.01454400              | -3.08469800 | 2.97995000  |
| H              | -2.14327300             | -3.04280400 | 2.81536600  |
| C              | 1.21813800              | -2.85443200 | 2.32549700  |
| H              | 0.01739500              | -3.45629500 | 3.99835900  |
| H              | 2.17142800              | -3.04367900 | 2.80328700  |
| Cl             | -5.60773400             | -0.00085500 | -2.41933100 |

|    |             |             |             |
|----|-------------|-------------|-------------|
| Cl | 5.65151400  | -0.00258600 | -2.39830200 |
| Cl | -0.07328400 | -0.00148100 | -2.32303100 |

1•Br<sup>-</sup>

Atomic

Coordinates (Angstroms)

Type

|    | X           | Y           | Z           |
|----|-------------|-------------|-------------|
| C  | 2.77991500  | -1.10705800 | 0.18627700  |
| N  | 3.83916700  | -1.18309400 | -0.61632900 |
| C  | 4.29617300  | -0.00003400 | -0.96238500 |
| C  | 2.77989800  | 1.10704200  | 0.18620400  |
| N  | 2.21900900  | 0.00000300  | 0.64220800  |
| N  | 3.83916500  | 1.18304200  | -0.61638400 |
| O  | 2.31689200  | -2.28769700 | 0.58573000  |
| C  | 1.08477700  | -2.36944700 | 1.22598700  |
| C  | 1.06787500  | -2.80024400 | 2.54243900  |
| C  | -0.07170900 | -2.13950800 | 0.50343600  |
| C  | -0.15848200 | -3.00928000 | 3.16081500  |
| H  | 2.00361900  | -2.97270900 | 3.05969400  |
| C  | -1.27300100 | -2.36868000 | 1.14915700  |
| H  | -0.03914500 | -1.76207000 | -0.52065300 |
| C  | -1.34192100 | -2.79895700 | 2.46408300  |
| H  | -0.19237300 | -3.34631100 | 4.19057700  |
| H  | -2.30892100 | -2.96952500 | 2.92080700  |
| O  | -2.46018600 | -2.28746600 | 0.42971400  |
| C  | -2.89442000 | -1.10667900 | -0.00168500 |
| N  | -2.37060300 | 0.00002400  | 0.49692200  |
| C  | -2.89440600 | 1.10672000  | -0.00171400 |
| C  | -4.32135600 | 0.00001300  | -1.25925000 |
| N  | -3.89101200 | 1.18310200  | -0.88046000 |
| N  | -3.89101900 | -1.18307100 | -0.88043700 |
| O  | -2.46017200 | 2.28751200  | 0.42967000  |
| O  | 2.31690100  | 2.28769800  | 0.58563700  |
| C  | 1.08479700  | 2.36947800  | 1.22591100  |
| C  | -0.07169800 | 2.13953600  | 0.50337600  |
| C  | 1.06791300  | 2.80030200  | 2.54235400  |
| C  | -1.27298100 | 2.36873300  | 1.14910400  |
| H  | -0.03914600 | 1.76207300  | -0.52070400 |
| C  | -0.15843700 | 3.00936300  | 3.16073800  |
| H  | 2.00366300  | 2.97276900  | 3.05959600  |
| C  | -1.34188500 | 2.79903700  | 2.46402100  |
| H  | -0.19231400 | 3.34641700  | 4.19049300  |
| H  | -2.30887900 | 2.96962400  | 2.92075100  |
| Cl | 5.69957200  | -0.00005600 | -1.99523600 |
| Cl | -5.64546900 | 0.00000600  | -2.39156200 |

Br -0.01366100 -0.00002700 -2.38631300

1•I<sup>-</sup>

| Atomic<br>Type | Coordinates (Angstroms) |             |             |
|----------------|-------------------------|-------------|-------------|
|                | X                       | Y           | Z           |
| C              | 2.84873200              | 0.35635000  | -1.10610200 |
| N              | 3.90234000              | -0.45219100 | -1.18494800 |
| C              | 4.35637700              | -0.80677900 | -0.00264600 |
| C              | 2.84869500              | 0.34880200  | 1.10865100  |
| N              | 2.28956600              | 0.81066900  | 0.00281300  |
| N              | 3.90225200              | -0.46030500 | 1.18203200  |
| O              | 2.38312000              | 0.76141800  | -2.28445500 |
| C              | 1.17148700              | 1.44206500  | -2.34580200 |
| C              | 1.19266100              | 2.77997900  | -2.70344900 |
| C              | -0.00668900             | 0.74296900  | -2.15855100 |
| C              | -0.01519500             | 3.44374700  | -2.87836100 |
| H              | 2.14277900              | 3.27996400  | -2.84532500 |
| C              | -1.18921700             | 1.43460400  | -2.34586400 |
| H              | -0.00338900             | -0.30170400 | -1.84800500 |
| C              | -1.21886500             | 2.77235800  | -2.70349100 |
| H              | -0.01853400             | 4.49121700  | -3.15732100 |
| H              | -2.17204200             | 3.26647600  | -2.84535800 |
| O              | -2.39655000             | 0.74629700  | -2.28457700 |
| C              | -2.85967800             | 0.33833000  | -1.10628700 |
| N              | -2.30313200             | 0.79572000  | 0.00269200  |
| C              | -2.85966100             | 0.33061200  | 1.10849000  |
| C              | -4.36064300             | -0.83359500 | -0.00295200 |
| N              | -3.90853000             | -0.48461500 | 1.18176700  |
| N              | -3.90856400             | -0.47635500 | -1.18521600 |
| O              | -2.39652800             | 0.73048700  | 2.28955500  |
| O              | 2.38303400              | 0.74593600  | 2.28969600  |
| C              | 1.17140600              | 1.42623300  | 2.35524600  |
| C              | -0.00672200             | 0.72801900  | 2.16450400  |
| C              | 1.19248800              | 2.76226500  | 2.71984100  |
| C              | -1.18930200             | 1.41862000  | 2.35518300  |
| H              | -0.00335600             | -0.31495300 | 1.84832300  |
| C              | -0.01542900             | 3.42501700  | 2.89819600  |
| H              | 2.14255500              | 3.26166600  | 2.86410300  |
| C              | -1.21906200             | 2.75449200  | 2.71974900  |
| H              | -0.01884400             | 4.47102700  | 3.18258700  |
| H              | -2.17226100             | 3.24790800  | 2.86389700  |
| Cl             | 5.75053200              | -1.84977300 | -0.00610100 |
| Cl             | -5.74900700             | -1.88422000 | -0.00653500 |
| I              | 0.00813300              | -2.44584000 | -0.00769700 |

1•SCN<sup>-</sup>

Atomic

Coordinates (Angstroms)

Type

|    | X           | Y           | Z           |
|----|-------------|-------------|-------------|
| C  | -2.82375100 | 1.05327400  | -0.48771600 |
| N  | -3.92530600 | 0.95061500  | -1.22690600 |
| C  | -4.48747600 | -0.23439200 | -1.12949800 |
| C  | -2.96273700 | -1.03445800 | 0.23727000  |
| N  | -2.30200100 | 0.11076200  | 0.27739200  |
| N  | -4.09320700 | -1.27048900 | -0.42161300 |
| O  | -2.24959100 | 2.25315300  | -0.52478000 |
| C  | -1.10212600 | 2.47934800  | 0.23164800  |
| C  | -1.24183500 | 3.11103100  | 1.45765600  |
| C  | 0.13233000  | 2.15979900  | -0.29994000 |
| C  | -0.10029400 | 3.43165100  | 2.17937300  |
| H  | -2.23231600 | 3.34444400  | 1.82849800  |
| C  | 1.25065200  | 2.49711700  | 0.44602700  |
| H  | 0.23592700  | 1.64165800  | -1.24923600 |
| C  | 1.15842300  | 3.12806400  | 1.67442500  |
| H  | -0.19136700 | 3.92493100  | 3.14026600  |
| H  | 2.06373200  | 3.37452100  | 2.21524400  |
| O  | 2.51595600  | 2.29383000  | -0.08921900 |
| C  | 2.94562500  | 1.04563200  | -0.27833300 |
| N  | 2.33363200  | 0.05581700  | 0.34720900  |
| C  | 2.80632200  | -1.13789800 | 0.03635000  |
| C  | 4.38744900  | -0.30200900 | -1.24154800 |
| N  | 3.84914000  | -1.39477900 | -0.74839600 |
| N  | 4.01238100  | 0.94589500  | -1.06360600 |
| O  | 2.24462500  | -2.22029700 | 0.57119200  |
| O  | -2.52115100 | -2.06267900 | 0.95784400  |
| C  | -1.25594400 | -1.99015000 | 1.52980700  |
| C  | -0.13513900 | -2.05836900 | 0.71905300  |
| C  | -1.17058200 | -1.94239000 | 2.91032100  |
| C  | 1.09773400  | -2.06780500 | 1.34348100  |
| H  | -0.23517600 | -2.09496200 | -0.36215400 |
| C  | 0.08559800  | -1.95870200 | 3.50442800  |
| H  | -2.07865100 | -1.89605300 | 3.49868700  |
| C  | 1.23066000  | -2.02254900 | 2.72241400  |
| H  | 0.17217700  | -1.92128000 | 4.58430000  |
| H  | 2.21921100  | -2.03777000 | 3.16445800  |
| Cl | -5.95816200 | -0.45292800 | -2.03649900 |
| Cl | 5.79047200  | -0.53565600 | -2.24890300 |
| C  | 0.11047000  | -0.71788000 | -2.60382400 |
| N  | 1.11840000  | -0.15002300 | -2.42399100 |

S -1.32020000 -1.52831900 -2.81197200

1•NO<sub>3</sub><sup>-</sup>

Atomic

Coordinates (Angstroms)

Type

X

Y

Z

|    |             |             |             |
|----|-------------|-------------|-------------|
| C  | -2.81273000 | 1.10892700  | 0.03176700  |
| N  | -3.91436300 | 1.18441400  | -0.71026000 |
| C  | -4.38098900 | -0.00025700 | -1.03647700 |
| C  | -2.81263400 | -1.10903700 | 0.03204500  |
| N  | -2.22504000 | 0.00002200  | 0.44953200  |
| N  | -3.91426900 | -1.18480400 | -0.70995200 |
| O  | -2.33312300 | 2.28613300  | 0.42670100  |
| C  | -1.13789400 | 2.32016100  | 1.13703800  |
| C  | -1.19266100 | 2.54796700  | 2.50241600  |
| C  | 0.05945700  | 2.21285400  | 0.45292000  |
| C  | -0.00315500 | 2.66322900  | 3.21097600  |
| H  | -2.15537000 | 2.63234600  | 2.99136900  |
| C  | 1.22213500  | 2.32162400  | 1.19253300  |
| H  | 0.07056400  | 2.02902000  | -0.61848200 |
| C  | 1.21792200  | 2.54933800  | 2.55838100  |
| H  | -0.02843400 | 2.84110700  | 4.28006100  |
| H  | 2.15786000  | 2.63275700  | 3.08989300  |
| O  | 2.44542200  | 2.28632600  | 0.52666100  |
| C  | 2.92892000  | 1.10760100  | 0.14445600  |
| N  | 2.38230500  | 0.00022200  | 0.61468900  |
| C  | 2.92901400  | -1.10724700 | 0.14478000  |
| C  | 4.44235100  | 0.00007300  | -1.00568400 |
| N  | 3.98463200  | -1.18366600 | -0.66348100 |
| N  | 3.98452900  | 1.18387300  | -0.66383100 |
| O  | 2.44561500  | -2.28590200 | 0.52732700  |
| O  | -2.33293200 | -2.28610300 | 0.42727800  |
| C  | -1.13771100 | -2.31985600 | 1.13764100  |
| C  | 0.05964500  | -2.21262100 | 0.45352000  |
| C  | -1.19248500 | -2.54733600 | 2.50307400  |
| C  | 1.22231700  | -2.32112000 | 1.19318300  |
| H  | 0.07076000  | -2.02904800 | -0.61792600 |
| C  | -0.00298400 | -2.66233100 | 3.21168500  |
| H  | -2.15519600 | -2.63167800 | 2.99202700  |
| C  | 1.21809700  | -2.54850200 | 2.55908600  |
| H  | -0.02827000 | -2.83996200 | 4.28081100  |
| H  | 2.15803100  | -2.63172000 | 3.09063600  |
| Cl | -5.83220900 | -0.00043500 | -2.00629400 |
| Cl | 5.84851800  | -0.00001600 | -2.03817000 |
| N  | -0.31454200 | -0.00024200 | -2.15426200 |



|   |             |             |             |
|---|-------------|-------------|-------------|
| O | 0.91685400  | -0.00018600 | -1.94469100 |
| O | -0.93165400 | 1.08035000  | -2.24524900 |
| O | -0.93161000 | -1.08088800 | -2.24492300 |

1•IO<sub>3</sub><sup>-</sup>

Atomic

Coordinates (Angstroms)

Type

|    | X           | Y           | Z           |
|----|-------------|-------------|-------------|
| C  | -2.82508300 | 1.11023400  | 0.05382900  |
| N  | -3.91686000 | 1.18446800  | -0.70436400 |
| C  | -4.38250800 | -0.00080400 | -1.02844100 |
| C  | -2.83013900 | -1.10868600 | 0.06333600  |
| N  | -2.24215400 | 0.00128700  | 0.47706600  |
| N  | -3.92576000 | -1.18494600 | -0.68877600 |
| O  | -2.35756100 | 2.28606400  | 0.46365800  |
| C  | -1.15842100 | 2.32239200  | 1.16739500  |
| C  | -1.20299000 | 2.56089000  | 2.53103800  |
| C  | 0.03272500  | 2.20717600  | 0.47433700  |
| C  | -0.00678300 | 2.67998100  | 3.22810700  |
| H  | -2.16157300 | 2.65023900  | 3.02723300  |
| C  | 1.20253100  | 2.32274500  | 1.20115800  |
| H  | 0.02114400  | 2.01898900  | -0.59635000 |
| C  | 1.20855900  | 2.56078600  | 2.56576700  |
| H  | -0.02230300 | 2.86566800  | 4.29612500  |
| H  | 2.15279200  | 2.64906800  | 3.08889000  |
| O  | 2.42089700  | 2.28882700  | 0.52735200  |
| C  | 2.90824700  | 1.11025800  | 0.14448100  |
| N  | 2.35213600  | 0.00259100  | 0.60219900  |
| C  | 2.90635700  | -1.10287500 | 0.13631000  |
| C  | 4.43131800  | 0.00634300  | -0.99138900 |
| N  | 3.97512700  | -1.17806000 | -0.65286000 |
| N  | 3.97456300  | 1.18955700  | -0.64742100 |
| O  | 2.41551400  | -2.28312600 | 0.50797000  |
| O  | -2.36420400 | -2.28322100 | 0.47882100  |
| C  | -1.15968300 | -2.32010500 | 1.17277200  |
| C  | 0.02665200  | -2.20083400 | 0.47177300  |
| C  | -1.19415600 | -2.56430900 | 2.53563500  |
| C  | 1.20166600  | -2.31941000 | 1.18960600  |
| H  | 0.00893000  | -2.00755800 | -0.59732000 |
| C  | 0.00698200  | -2.68562800 | 3.22376200  |
| H  | -2.14928400 | -2.65653900 | 3.03788300  |
| C  | 1.21732400  | -2.56335600 | 2.55314500  |
| H  | -0.00059300 | -2.87574100 | 4.29104700  |
| H  | 2.16534500  | -2.65379600 | 3.06902600  |
| Cl | -5.81906600 | -0.00179200 | -2.02340900 |

|    |             |             |             |
|----|-------------|-------------|-------------|
| Cl | 5.84312900  | 0.00923800  | -2.01817000 |
| O  | 1.44876700  | -0.04818600 | -2.25591500 |
| O  | -0.98493900 | 1.44634800  | -2.35974300 |
| O  | -1.06196300 | -1.40482100 | -2.35302100 |
| I  | -0.16714500 | -0.00400600 | -3.05774300 |

1•SO<sub>4</sub><sup>2-</sup>

Atomic

Coordinates (Angstroms)

Type

|   | X           | Y           | Z           |
|---|-------------|-------------|-------------|
| C | 2.93395900  | 1.01757500  | -0.26228700 |
| N | 3.96444200  | 1.04722400  | 0.58472900  |
| C | 4.37076900  | -0.15544700 | 0.90854100  |
| C | 2.87285900  | -1.18894400 | -0.31582400 |
| N | 2.39895900  | -0.05935800 | -0.80583300 |
| N | 3.89784200  | -1.31678800 | 0.52872900  |
| O | 2.50909900  | 2.22174400  | -0.63917600 |
| C | 1.28062800  | 2.33616400  | -1.28588100 |
| C | 1.28804100  | 2.72619200  | -2.61711600 |
| C | 0.11658000  | 2.16766200  | -0.56054600 |
| C | 0.07367700  | 2.95405800  | -3.25276000 |
| H | 2.23344700  | 2.84351600  | -3.13379700 |
| C | -1.07383100 | 2.40332200  | -1.22752000 |
| H | 0.08514800  | 1.84455100  | 0.48813400  |
| C | -1.11971600 | 2.79424100  | -2.55778400 |
| H | 0.05661100  | 3.25430000  | -4.29546500 |
| H | -2.08038700 | 2.96456900  | -3.02955000 |
| O | -2.27227100 | 2.35586700  | -0.53133600 |
| C | -2.72802100 | 1.18000800  | -0.09333900 |
| N | -2.21512600 | 0.06775400  | -0.58622000 |
| C | -2.78891500 | -1.03246500 | -0.13521200 |
| C | -4.28041300 | 0.09468100  | 1.00755800  |
| N | -3.86684200 | -1.09509000 | 0.64907000  |
| N | -3.80187700 | 1.27265900  | 0.69343900  |
| O | -2.39903200 | -2.21422500 | -0.61815200 |
| O | 2.38215100  | -2.34834000 | -0.74985300 |
| C | 1.14658500  | -2.36435600 | -1.39284900 |
| C | -0.00337400 | -2.15930200 | -0.65422000 |
| C | 1.12655100  | -2.69935300 | -2.73886300 |
| C | -1.20774700 | -2.30064000 | -1.32273100 |
| H | -0.01364400 | -1.87864200 | 0.40711100  |
| C | -0.10122500 | -2.83300600 | -3.37550700 |
| H | 2.06190700  | -2.84840200 | -3.26557400 |
| C | -1.28084800 | -2.63478100 | -2.66718600 |
| H | -0.13963700 | -3.08905000 | -4.42936700 |

|    |             |             |             |
|----|-------------|-------------|-------------|
| H  | -2.25138700 | -2.73371300 | -3.13911300 |
| C1 | 5.77080400  | -0.21906500 | 1.97107300  |
| C1 | -5.73082700 | 0.11519400  | 2.01035200  |
| O  | 1.09900800  | -0.06583700 | 1.64522700  |
| O  | -1.02834200 | -1.24260200 | 1.90678900  |
| S  | -0.22617900 | -0.04859600 | 2.37821000  |
| O  | -0.03086900 | -0.08531200 | 3.84351800  |
| O  | -0.96719400 | 1.20315800  | 1.95938800  |

**Table S2. The single-point energies of  $1\cdot\text{Cl}^-$ ,  $1\cdot\text{Br}^-$ ,  $1\cdot\text{I}^-$ ,  $1\cdot\text{SCN}^-$ ,  $1\cdot\text{NO}_3^-$ ,  $1\cdot\text{IO}_3^-$ ,  $1\cdot\text{SO}_4^{2-}$  and their corresponding neutrals both at the anions' optimized geometries calculated using the  $\omega\text{B97XD}$  and  $\text{M06-2X}$  functionals.**

| $\omega\text{B97XD}$     | anionic        | neutral        |
|--------------------------|----------------|----------------|
| $1\cdot\text{Cl}^-$      | -2700.77896508 | -2700.59398107 |
| $1\cdot\text{Br}^-$      | -4814.75231481 | -4814.58162261 |
| $1\cdot\text{I}^-$       | -2536.37337304 | -2536.22066882 |
| $1\cdot\text{SCN}^-$     | -2731.59758712 | -2731.43117043 |
| $1\cdot\text{NO}_3^-$    | -2520.85945496 | -2520.65639465 |
| $1\cdot\text{IO}_3^-$    | -2761.86507828 | -2761.64762266 |
| $1\cdot\text{SO}_4^{2-}$ | -2939.56042567 | -2939.52062566 |

| $\text{M06-2X}$          | anion          | neutral        |
|--------------------------|----------------|----------------|
| $1\cdot\text{Cl}^-$      | -2700.72794264 | -2700.53764784 |
| $1\cdot\text{Br}^-$      | -4814.70983385 | -4814.53541321 |
| $1\cdot\text{I}^-$       | -2536.16707211 | -2536.01643057 |
| $1\cdot\text{SCN}^-$     | -2731.55268311 | -2731.38236155 |
| $1\cdot\text{NO}_3^-$    | -2520.80702768 | -2520.58880930 |
| $1\cdot\text{IO}_3^-$    | -2761.63187281 | -2761.40768208 |
| $1\cdot\text{SO}_4^{2-}$ | -2939.50402355 | -2939.45410113 |

**Table S3.** Electron Density of the Complexes with  $\rho_{\max}$  Listed in  $e/a_0^3$  ( $e/\text{\AA}^3$ ). The Density is Plotted in the Plane Cut along two hydrogen in the benzene and the corresponding atom in the anion.

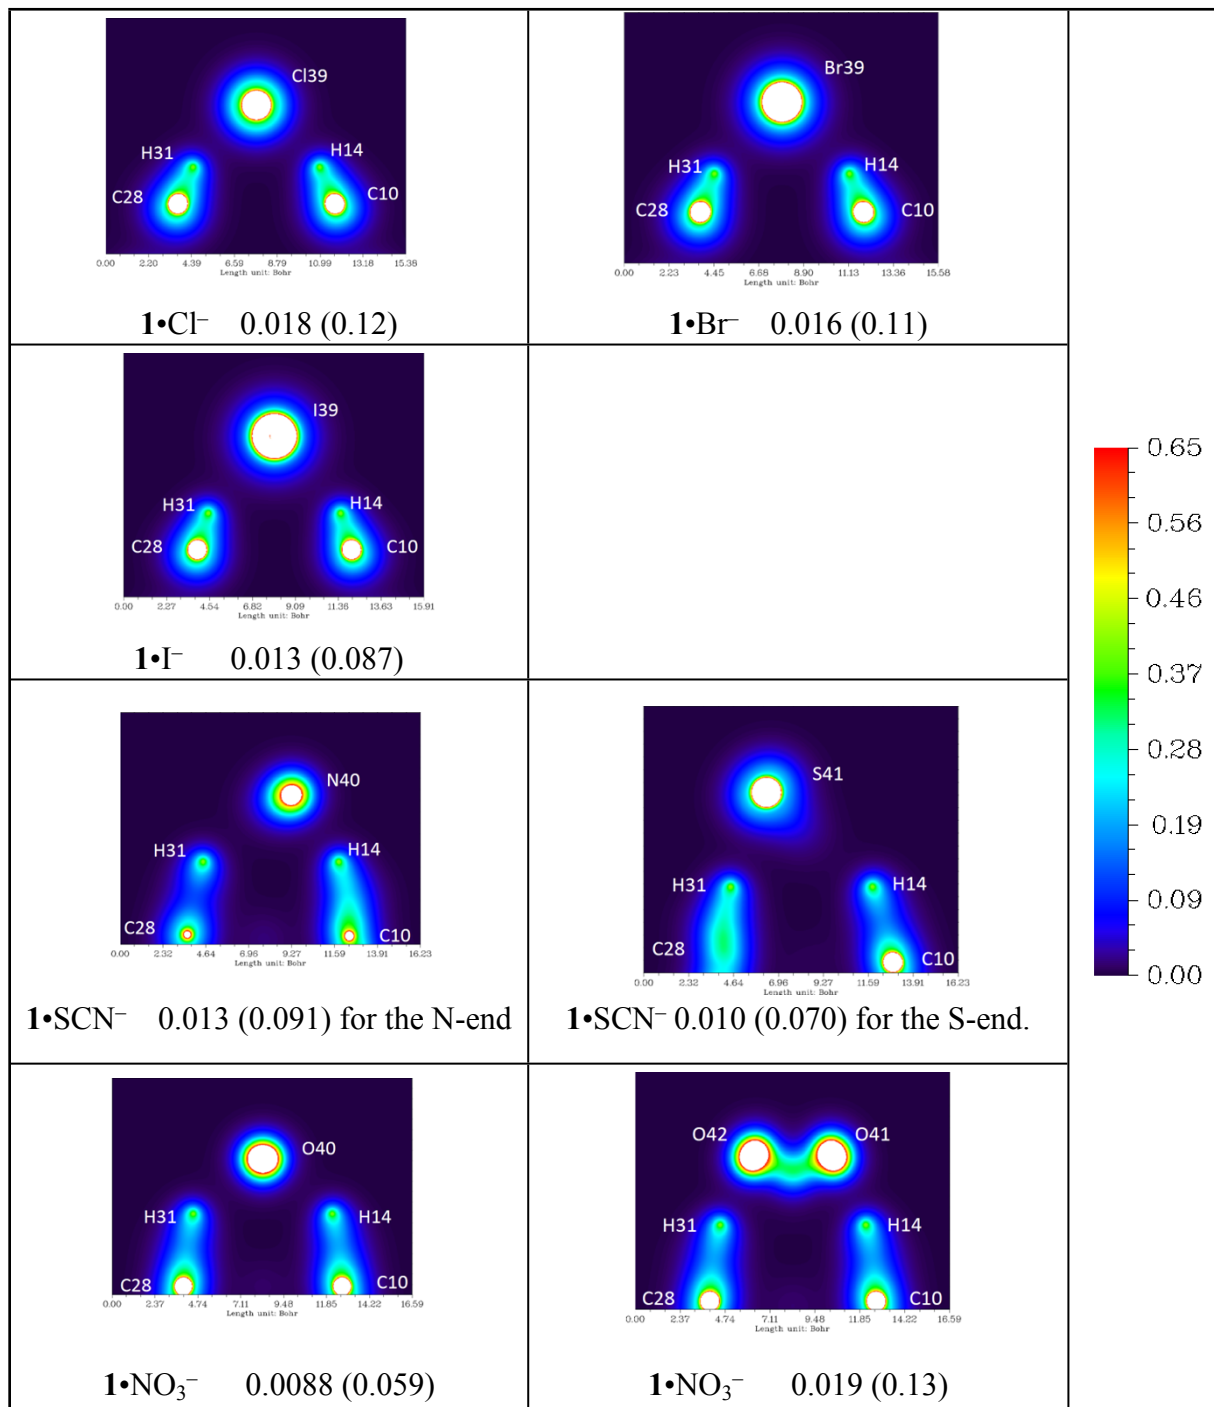

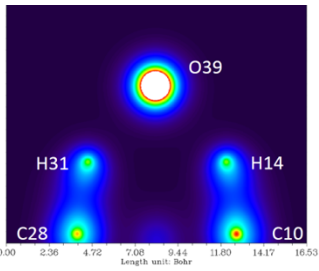

$1 \cdot \text{IO}_3^-$  0.0045 (0.031)

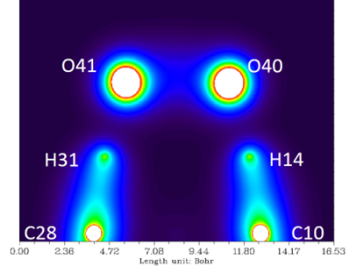

$1 \cdot \text{IO}_3^-$  0.019 (0.13)

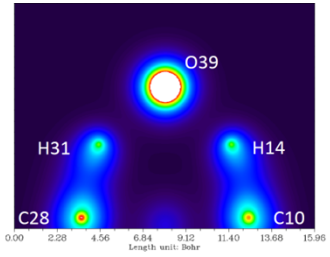

$1 \cdot \text{SO}_4^{2-}$  0.011 (0.074)

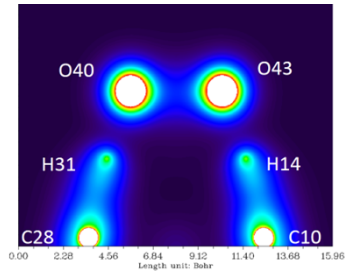

$1 \cdot \text{SO}_4^{2-}$  0.030 (0.20)
